# Supplementary material for: Antibacterial Properties of Plasma-Activated Perfluorinated Substrates with Silver Nanoclusters Deposition
Source: PubMed Central journal article supplement (PMC7828452; doi:10.3390/nano11010182), 2021-01-13
Supplement: nanomaterials-11-00182-s001.pdf [file nanomaterials-11-00182-s001.pdf]

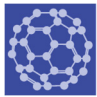

Supplementary Material

# Antibacterial Properties of Plasma-Activated Perfluorinated Substrates with Silver Nanoclusters Deposition

Petr Slepíčka <sup>1,\*</sup>, Silvie Rimpelová <sup>2,\*</sup>, Nikola Slepíčková Kasálková <sup>1</sup>, Dominik Fajstavr <sup>1</sup>, Petr Sajdl <sup>3</sup>, Zdeňka Kolská <sup>4</sup> and Václav Švorčík <sup>1</sup>

<sup>1</sup> Department of Solid State Engineering, University of Chemistry and Technology Prague, 166 28 Prague, Czech Republic; nikola.kasalkova@vscht.cz (N.S.K.); dominik.fajstavr@vscht.cz (D.F.)  
vaclav.svorcik@vscht.cz (V.Š)

<sup>2</sup> Department of Biochemistry and Microbiology, University of Chemistry and Technology Prague, 166 28 Prague, Czech Republic

<sup>3</sup> Department of Power Engineering, University of Chemistry and Technology Prague, 166 28 Prague, Czech Republic; petr.sajdl@vscht.cz

<sup>4</sup> Faculty of Science, J. E. Purkyně University in Ústí nad Labem, 400 96 Ústí nad Labem, Czech Republic; zdenka.kolska@ujep.cz

\* Correspondence: petr.slepicka@vscht.cz (P.S.); silvie.rimpelova@vscht.cz (S.R.)

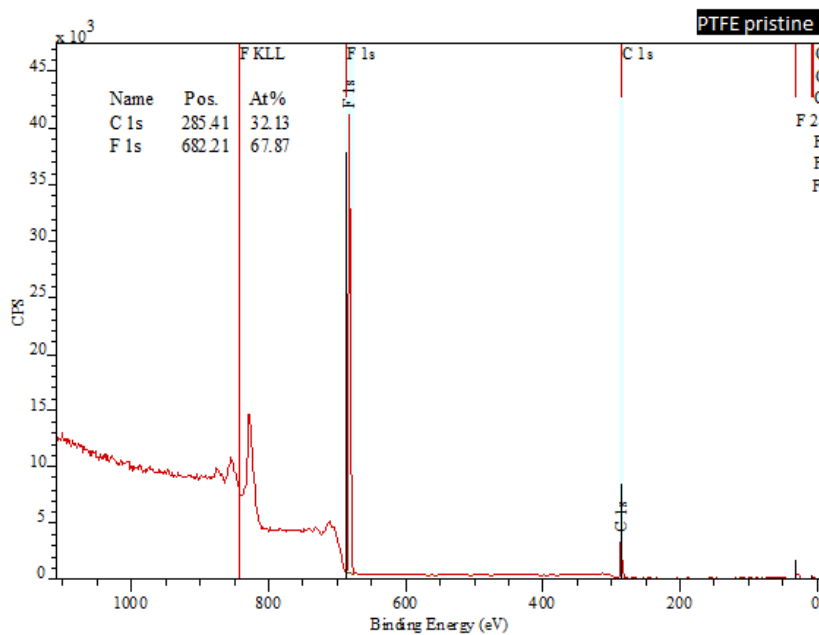

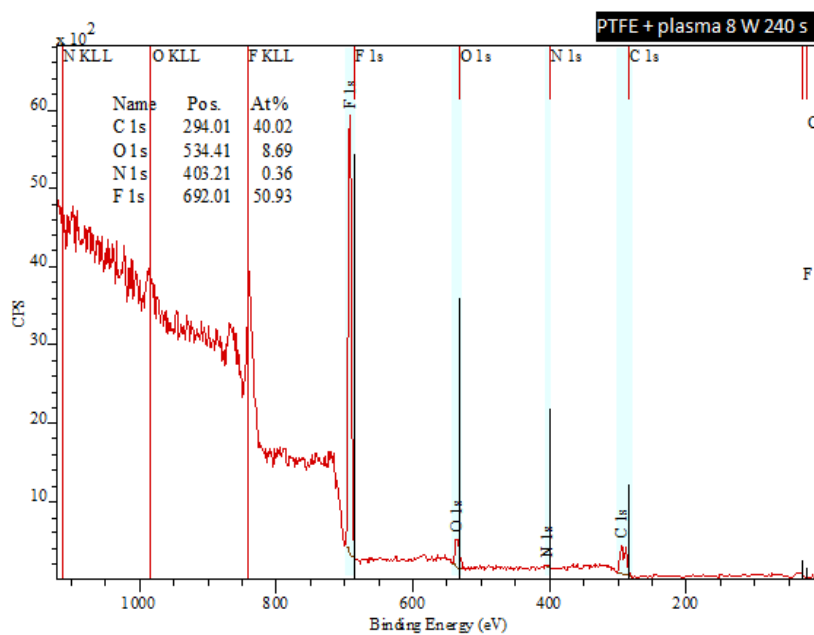

Figure S1. XPS spectra of a pristine PTFE and plasma-treated PTFE sample at 8 W for 240 s.
